# Supplementary material
Source: publisher figshare collection journal article supplement (https://rs.figshare.com/ndownloader/files/35933383)
Supplement: Supplementary file 1 [file 35933383]

clear % 3D truncated sphere diffraction vertical section
% take slit radius size r = 1
load('parameters.mat','hsi','Rs', 'Depth','wl', 'n','Asp', 'savef', 'f'); 
w=0.5/Asp;
ra=0.5*(1+w^2); % radius of truncated sphere curvature
xmax=w; %thmax=asin(w/ra); 
% cosfactor = @(y,x,yc,xc) sqrt(1-(x-xc).^2./((x-xc).^2+(y-yc).^2));
funz = @(rs) ra-sqrt(ra^2-rs.^2); 
funR = @(rs, phs, Xscr,L) sqrt((1-funz(rs)+L).^2+(rs.*cos(phs)-Xscr).^2+(rs.*sin(phs)).^2);
funth = @(rs, phs, Xscr,L) atan(sqrt((rs.*cos(phs)-Xscr).^2+(rs.*sin(phs)).^2)./(1-funz(rs)+L));
funphase = @(rs,phs,Xscr,L,wl,phase) rs.*(cos((2*pi./wl).*funz(rs)+(2*pi./wl).*n.*funR(rs, phs, Xscr, L)+phase)+1i*sin((2*pi./wl).*funz(rs)+(2*pi./wl).*n.*funR(rs, phs, Xscr, L)+phase)).*cos(0.5*funth(rs, phs, Xscr, L))./funR(rs, phs, Xscr, L);  % point source 1D integration
positionx=zeros(1,101);positiony=zeros(1,101);Int=zeros(1,101); % Int1=zeros(1,101);Int2=zeros(1,101);Int3=zeros(1,101);Int4=zeros(1,101);
positionx1=zeros(1,101);positiony1=zeros(1,101);
for m=1:101
    x=(m-51)*xmax/50;positionx1(m)=x*hsi;
    positiony1(m)=(1-funz(x))*hsi;
end
% hold on;
figure(1); plot(positionx1,positiony1);
wln=round(wl*1000);wlns=num2str(wln);wl=wl/hsi;
savefile = ['data08/sample/sphxzwl',wlns, savef, '.dat'];
for j=1:101
    L=(j-1)*Depth/100;
    for i=1:101
        Xs=(i-51)*Rs/50;
        phase=0; %-(2*pi/wl)*n*(1+L);% thmax2=2*thmax/3;thmax1=thmax/3;
       % amp1=integral2 (@(ths, phs) funphase(ths,phs,Xs, L,wl,phase),0,thmax1,-pi,pi,'RelTol',1e-6,'AbsTol',1e-6); %*cos(theda); % integration
       % amp2=integral2 (@(ths, phs) funphase(ths,phs,Xs, L,wl,phase),0,thmax2,-pi,pi,'RelTol',1e-6,'AbsTol',1e-6);
       % amp3=integral2 (@(ths, phs) funphase(ths,phs,Xs, L,wl,phase),0,thmax,-pi,pi,'RelTol',1e-6,'AbsTol',1e-6);
        amp=integral2 (@(rs, phs) funphase(rs,phs,Xs, L,wl,phase),0,xmax,-pi,pi,'method','iterated','RelTol',1e-6,'AbsTol',0);
        Int(i)=abs(amp)^2; %Int2(i)=abs(amp2)^2;Int3(i)=abs(amp3)^2;
        positiony(i)=L*hsi;positionx(i)=Xs*hsi;
    end
    data=[positionx', positiony',Int'];
    if j==1
        save(savefile, 'data','-ascii','-tabs');
    else
        save(savefile, 'data','-ascii','-tabs','-append');
    end
end
